# Supplementary material for: Partitioning to ordered membrane domains regulates the kinetics of secretory traffic
Source: eLife. 2024 Jun 5;12:RP89306. doi: 10.7554/eLife.89306 (PMC11152573; doi:10.7554/eLife.89306)
Supplement: Figure 1—source data 1. [file elife-89306-fig1-data1.xlsx]

## Sheet: LAT-TMD
Distance	Intensity
0	0
0.1	0.00129711
0.2	0.00543115
0.3	0.0196462
0.4	0.0153377
0.5	0.0288928
0.6	0.0246829
0.7	0.0353556
0.8	0.0376312
0.9	0.0473557
1	0.0485846
1.1	0.0504127
1.2	0.0652118
1.3	0.0706202
1.4	0.0848504
1.5	0.100355
1.6	0.109495
1.7	0.130977
1.8	0.149364
1.9	0.171028
2	0.214341
2.1	0.23511
2.2	0.309561
2.3	0.462012
2.4	0.711428
2.5	0.929592
2.6	1
2.7	0.925299
2.8	0.804721
2.9	0.731567
3	0.701613
3.1	0.693967
3.2	0.668502
3.3	0.62742
3.4	0.616929
3.5	0.595819
3.6	0.593733
3.7	0.592967
3.8	0.594757
3.9	0.592428
4	0.584873
4.1	0.586952
4.2	0.586656
4.3	0.594909
4.4	0.598034
4.5	0.607409
4.6	0.607144
4.7	0.605498
4.8	0.613986
4.9	0.626729
5	0.617475
5.1	0.613758
5.2	0.606059
5.3	0.597283
5.4	0.584304
5.5	0.583758
5.6	0.589129
5.7	0.592254
5.8	0.567283
5.9	0.563444
6	0.577364
6.1	0.566896
6.2	0.561859
6.3	0.56506
6.4	0.55237
6.5	0.537297
6.6	0.5333
6.7	0.525548
6.8	0.522779
6.9	0.524501
7	0.529242
7.1	0.527656
7.2	0.530008
7.3	0.524213
7.4	0.526951
7.5	0.526018
7.6	0.524675
7.7	0.530592
7.8	0.531973
7.9	0.537411
8	0.529849
8.1	0.522567
8.2	0.522203
8.3	0.50842
8.4	0.507312
8.5	0.50798
8.6	0.502177
8.7	0.499621
8.8	0.495805
8.9	0.50402
9	0.504384
9.1	0.498984
9.2	0.490951
9.3	0.50779
9.4	0.502078
9.5	0.498058
9.6	0.502685
9.7	0.506455
9.8	0.514534
9.9	0.515474
10	0.507563
10.1	0.527065
10.2	0.51068
10.3	0.497618
10.4	0.503254
10.5	0.515239
10.6	0.518433
10.7	0.521907
10.8	0.521095
10.9	0.517553
11	0.518971
11.1	0.52975
11.2	0.550944
11.3	0.529447
11.4	0.527315
11.5	0.543009
11.6	0.541614
11.7	0.543017
11.8	0.540225
11.9	0.555776
12	0.562087
12.1	0.55548
12.2	0.553743
12.3	0.554934
12.4	0.55309
12.5	0.561715
12.6	0.556087
12.7	0.555609
12.8	0.561783
12.9	0.558506
13	0.555768
13.1	0.563331
13.2	0.5633
13.3	0.565803
13.4	0.571576
13.5	0.582855
13.6	0.586405
13.7	0.586405
13.8	0.599475
13.9	0.601076
14	0.631994
14.1	0.615207
14.2	0.622231
14.3	0.670604
14.4	0.73467
14.5	0.769821
14.6	0.735868
14.7	0.593369
14.8	0.408937
14.9	0.278779
15	0.213711
15.1	0.182293
15.2	0.163314
15.3	0.128156
15.4	0.106029
15.5	0.0850249
15.6	0.0716139
15.7	0.0645063
15.8	0.0551839
15.9	0.0501775
16	0.0392773
16.1	0.0382229
16.2	0.0259194
16.3	0.0180078
16.4	0.0115374
16.5	0.0128649

## Sheet: allL-TMD
Distance	Intensity
0	0
0.1	0.00346089
0.2	0.0142514
0.3	0.0193198
0.4	0.0164347
0.5	0.0238364
0.6	0.0350648
0.7	0.0330374
0.8	0.0356946
0.9	0.0492442
1	0.0733805
1.1	0.106886
1.2	0.170363
1.3	0.196287
1.4	0.250972
1.5	0.379631
1.6	0.536528
1.7	0.617101
1.8	0.535533
1.9	0.480398
2	0.445711
2.1	0.454103
2.2	0.436336
2.3	0.41199
2.4	0.384789
2.5	0.389749
2.6	0.391135
2.7	0.392214
2.8	0.376889
2.9	0.38104
3	0.374778
3.1	0.410017
3.2	0.40583
3.3	0.412278
3.4	0.419008
3.5	0.445939
3.6	0.427075
3.7	0.432234
3.8	0.429343
3.9	0.444902
4	0.46115
4.1	0.467101
4.2	0.486996
4.3	0.47425
4.4	0.457708
4.5	0.478515
4.6	0.469122
4.7	0.480614
4.8	0.473339
4.9	0.500366
5	0.500156
5.1	0.489725
5.2	0.505536
5.3	0.497487
5.4	0.491675
5.5	0.491261
5.6	0.507492
5.7	0.482012
5.8	0.488448
5.9	0.490595
6	0.474682
6.1	0.462272
6.2	0.466459
6.3	0.455632
6.4	0.480752
6.5	0.485976
6.6	0.464923
6.7	0.458997
6.8	0.45625
6.9	0.455656
7	0.452975
7.1	0.46289
7.2	0.439965
7.3	0.446917
7.4	0.45508
7.5	0.438352
7.6	0.440961
7.7	0.44913
7.8	0.45469
7.9	0.450006
8	0.462476
8.1	0.475264
8.2	0.487782
8.3	0.500744
8.4	0.501416
8.5	0.535875
8.6	0.564509
8.7	0.567628
8.8	0.614893
8.9	0.63026
9	0.660713
9.1	0.724874
9.2	0.767904
9.3	0.802579
9.4	0.885647
9.5	0.97506
9.6	1
9.7	0.802063
9.8	0.545435
9.9	0.370903
10	0.292814
10.1	0.24249
10.2	0.196269
10.3	0.133013
10.4	0.084327
10.5	0.0797025
10.6	0.0725228
10.7	0.0513496
10.8	0.0369062
10.9	0.0260917
11	0.0231586
11.1	0.0232366
11.2	0.0235965
11.3	0.0174664
11.4	0.00292107
11.5	0.00266315
11.6
11.7
11.8
11.9
12
12.1
12.2
12.3
12.4
12.5
12.6
12.7
12.8
12.9
13
13.1
13.2
13.3
13.4
13.5
13.6
13.7
13.8
13.9
14
14.1
14.2
14.3
14.4
14.5
14.6
14.7
14.8
14.9
15
15.1
15.2
15.3
15.4
15.5
15.6
15.7
15.8
15.9
16
16.1
16.2
16.3
16.4
16.5
