# Supplementary material for: Partitioning to ordered membrane domains regulates the kinetics of secretory traffic
Source: eLife. 2024 Jun 5;12:RP89306. doi: 10.7554/eLife.89306 (PMC11152573; doi:10.7554/eLife.89306)
Supplement: Figure 1—source data 2. [file elife-89306-fig1-data2.xlsx]

## Sheet: RFP (only)
LAT	LAT-TMD	LAT-allL	allL-TMD
1.42	1.28	0.42	0.52
1.3	1.4	0.48	0.53
1.23	1.36	0.43

## Sheet: SBP-tagged (RUSH)
LAT	LAT-TMD	LAT-allL	allL-TMD
1.29	1.4	0.67	0.5
1.35	1.21	0.54	0.42
1.36	1.43	0.58
