# Supplementary material for: Partitioning to ordered membrane domains regulates the kinetics of secretory traffic
Source: eLife. 2024 Jun 5;12:RP89306. doi: 10.7554/eLife.89306 (PMC11152573; doi:10.7554/eLife.89306)
Supplement: Figure 1—source data 3. [file elife-89306-fig1-data3.xlsx]

## Sheet: LAT
Time (h)	sample 1	sample 2	sample 3
0	1	1	1
0.166667	0.980911	0.880815	0.883132
0.333333	0.596125	0.808921	0.577465
0.5	0.318992	0.575189	0.449159
0.666667	0.371229	0.309349	0.407399
0.833333	0.362191	0.213863	0.413329
1	0.247672	0.227545	0.391742
1.16667	0.13663	0.157727	0.274006
1.33333	0.038737	0.122941	0.220758
1.5	0.021219	0.109514	0.128505

## Sheet: LAT-TMD
Time	sample 1	sample 2	sample 3	sample 4
0:00:00	1	1	1	1
0:10:00	0.955976	0.977795	0.967031	0.972169
0:20:00	0.942434	0.978659	0.953704	0.95341
0:30:00	0.917125	0.973441	0.921077	0.934233
0:40:00	0.875407	0.961174	0.905925	0.925935
0:50:00	0.845681	0.958163	0.883607	0.901291
1:00:00	0.831261	0.939927	0.870123	0.888171
1:10:00	0.826718	0.918928	0.860023	0.840142
1:20:00	0.808719	0.897342	0.848891	0.830781
1:30:00	0.782351	0.880003	0.831289	0.820004
