# Supplementary material for: Partitioning to ordered membrane domains regulates the kinetics of secretory traffic
Source: eLife. 2024 Jun 5;12:RP89306. doi: 10.7554/eLife.89306 (PMC11152573; doi:10.7554/eLife.89306)
Supplement: Figure 1—source data 4. [file elife-89306-fig1-data4.xlsx]

## Sheet: Sheet1
biotin 4h			ceramide + biotin 4 h			NT
0.21	0.22	0.2	0.38	0.43	0.44	0.91	0.85	0.85
0.2	0.21	0.25	0.39	0.38	0.5	0.92	0.87	0.86
0.24	0.23	0.57	0.35	0.44	0.52	0.94	0.93	0.89
0.18	0.25	0.23	0.28	0.37	0.31	0.94	0.95	0.91
0.22	0.17	0.56	0.35	0.22	0.55	0.88	0.96	0.79
0.24	0.23	0.21	0.36	0.25	0.29	0.85	0.93	0.89
0.3	0.2	0.3	0.29	0.36	0.68	0.9	0.87	0.9
0.4	0.24	0.29	0.31	0.42	0.25	0.91	0.77	0.93
0.2	0.29	0.25	0.37	0.7	0.27	0.93	0.91	0.89
0.22	0.22	0.22	0.26	0.51	0.48	0.8	0.87	0.91
0.18	0.25	0.24	0.26	0.31	0.38		0.94	0.93
0.2	0.28			0.21	0.36		0.88	0.95
0.4	0.26			0.39	0.33		0.92	0.93
				0.45			0.92	0.9
							0.93	0.88
							0.95	0.95
							0.91	0.94
							0.94
							0.93
							0.85
