# Supplementary material for: Partitioning to ordered membrane domains regulates the kinetics of secretory traffic
Source: eLife. 2024 Jun 5;12:RP89306. doi: 10.7554/eLife.89306 (PMC11152573; doi:10.7554/eLife.89306)
Supplement: Figure 2—source data 1. [file elife-89306-fig2-data1.xlsx]

## Sheet: Sheet1
time	LAT	LATΔCt1	LATΔCt2	LATΔCt3	LATΔCt4	LAT-TMDwt
0:00:00	1	1	1	0.977778	0.983333	1
0:15:00	0.964286	0.958333	0.769231	1	1	1
0:30:00	0.761905	0.56	0.454545	0.886364	0.933333	1
0:45:00	0.441176	0.357143				1
1:00:00	0.242991	0.214286	0.150685	0.818182	0.878378	0.97541
1:30:00	0.112903	0	0.05	0.686275	0.638889	0.928571
2:00:00	0.034188	0.026316	0	0.560976	0.544118	0.834395
3:00:00	0	0	0.023256	0.454545	0.411765	0.527027
4:00:00	0	0	0	0.295082	0.173913	0.292683
6:00:00				0.106383	0.025974	0.222222
9:00:00				0.05	0.021739	0.071429
