# Supplementary material for: Partitioning to ordered membrane domains regulates the kinetics of secretory traffic
Source: eLife. 2024 Jun 5;12:RP89306. doi: 10.7554/eLife.89306 (PMC11152573; doi:10.7554/eLife.89306)
Supplement: Figure 2—source data 2. [file elife-89306-fig2-data2.xlsx]

## Sheet: Sheet1
LAT	LATΔCt1	LATΔCt2	LATΔCt3	LATΔCt4	LAT-TMD
0.7	0.58	0.45	2.57	2.1	3.1
0.65	0.62	0.43	2.35	2.9	2.8
0.72		0.425		1.95	3.25
0.72					3.15
