# Supplementary material for: Partitioning to ordered membrane domains regulates the kinetics of secretory traffic
Source: eLife. 2024 Jun 5;12:RP89306. doi: 10.7554/eLife.89306 (PMC11152573; doi:10.7554/eLife.89306)
Supplement: Figure 2—source data 3. [file elife-89306-fig2-data3.xlsx]

## Sheet: Sheet1
time	LAT	LAT-P148E	LAT-P148S	LAT-P148A	LAT-A150S	LAT-P151S	LAT-P151A	LAT-A183S	LAT-TMDwt
0:00:00	1	1	1	0.990291	0.966667	0.983333	1	1	1
0:15:00	0.964286	1	1	0.991935	0.990385	0.772727	0.925926	0.967742	1
0:30:00	0.761905	0.970588	1	0.919708	0.925676	0.615385	0.784615	0.903614	1
0:45:00	0.441176								1
1:00:00	0.242991	0.865979	0.865169	0.770833	0.864516	0.322917	0.575758	0.5	0.97541
1:30:00	0.112903	0.698925	0.714286	0.734848	0.721311	0.086957	0.358209	0.343284	0.928571
2:00:00	0.034188	0.579545	0.6	0.638655	0.669118	0.060606	0.246154	0.25974	0.834395
3:00:00	0	0.494737	0.432099	0.448276	0.462185			0.142857	0.527027
4:00:00	0	0.393162	0.32	0.238095	0.271028	0.030928	0.114603	0.067961	0.292683
6:00:00	0	0.204545	0.188889	0.109244	0.125	0	0.037561	0.038961	0.222222
9:00:00									0.071429
