# Supplementary material for: Partitioning to ordered membrane domains regulates the kinetics of secretory traffic
Source: eLife. 2024 Jun 5;12:RP89306. doi: 10.7554/eLife.89306 (PMC11152573; doi:10.7554/eLife.89306)
Supplement: Figure 2—source data 4. [file elife-89306-fig2-data4.xlsx]

## Sheet: Sheet1
LAT	P148E	P148S	P148A	A150S	P151S	P151A	A183S	LAT-TMD
0.7	2.7	2.6	2.7	2.67	0.7	1.17	0.93	3.1
0.65	3.24	2.8	2.76	2.79	0.69	0.91	1.07	2.8
0.72	3							3.25
0.72								3.15
