# Supplementary material for: Partitioning to ordered membrane domains regulates the kinetics of secretory traffic
Source: eLife. 2024 Jun 5;12:RP89306. doi: 10.7554/eLife.89306 (PMC11152573; doi:10.7554/eLife.89306)
Supplement: Figure 3—source data 1. [file elife-89306-fig3-data1.xlsx]

## Sheet: Sheet1
Hours	LAT			LAT-allL			LAT-TMD			allL-TMD
0:00:00.000	1	1	1	1	1	1	1	1	1	1	1	1
0:15:00.000	0.704475	0.7	0.94	0.89	0.94	0.93	0.806177	0.914742	0.89034	0.88	0.92891	0.805412
0:30:00.000	0.57357	0.6	0.77	0.7	0.77	0.79	0.75584	0.727614	0.70145	0.89	0.658795	0.728162
0:45:00.000	0.35025	0.58	0.58	0.69	0.62	0.65	0.473989	0.716833	0.67812	0.82	0.619978	0.810738
1:00:00.000		0.38	0.48	0.7	0.55	0.57	0.464707	0.542864	0.469034	0.82	0.400483	0.70312
1:30:00.000		0.34	0.39	0.67	0.47	0.53	0.434443	0.285382	0.32471	0.68	0.558309	0.674142
2:00:00.000		0.32	0.25	0.5	0.39	0.48	0.318864	0.285382	0.279823	0.56	0.343746	0.683214
3:00:00.000	0.168674	0.2	0.22	0.32	0.33	0.32	0.255851	0.160089	0.204561	0.25	0.507939	0.389835
4:00:00.000							0.187983	0.218679	0.190081	0.29	0.351459	0.431439
6:00:00.000
9:00:00.000
24:00:00.000	0	0	0				0	0	0
30:00:00.000				0	0	0				0	0	0
