# Supplementary material for: Partitioning to ordered membrane domains regulates the kinetics of secretory traffic
Source: eLife. 2024 Jun 5;12:RP89306. doi: 10.7554/eLife.89306 (PMC11152573; doi:10.7554/eLife.89306)
Supplement: Figure 3—source data 2. [file elife-89306-fig3-data2.xlsx]

## Sheet: Sheet1
LAT	LAT-allL	LAT-TMD	allL-TMD
0.4949	2.104	1.015	2.17
0.9128	1.372	0.9949	1.705
0.994	1.639	0.9544	3.271
	2.761		2.08
