# Supplementary material for: Partitioning to ordered membrane domains regulates the kinetics of secretory traffic
Source: eLife. 2024 Jun 5;12:RP89306. doi: 10.7554/eLife.89306 (PMC11152573; doi:10.7554/eLife.89306)
Supplement: Figure 3—source data 3. [file elife-89306-fig3-data3.xlsx]

## Sheet: Sheet1
LAT	LAT-allL
1.9	2.5
1.1	2.6
1.4	2.9
