# Supplementary material for: Partitioning to ordered membrane domains regulates the kinetics of secretory traffic
Source: eLife. 2024 Jun 5;12:RP89306. doi: 10.7554/eLife.89306 (PMC11152573; doi:10.7554/eLife.89306)
Supplement: Figure 3—source data 4. [file elife-89306-fig3-data4.xlsx]

## Sheet: Sheet1
	LAT																				LAT-allL
0:00:00	79.3444	82.9022	99.8868	127.918	92.5974	90.3447	105.655	90.0859	134.859	96.4067											83.9997	90.3996	118.854	116.054	102.453	91.5413	106.769	93.6607	106.012	90.2566
1:00:00	34.0699	78.2198	74.8918	45.4317	56.5979	54.0177	53.5138	93.4661	67.3634	73.4382											67.9441	51.1857	67.0089	65.8275	83.3623	68.6293	85.0153	111.91	62.8414	78.5364
2:00:00	15.1979	43.4007	67.6298	58.6827	17.3013	29.2627	57.1453	27.5447	24.5723	29.8236	38.8228										76.8987	77.8372	34.5839	69.3915	49.6739	76.2225	70.046	55.3627	77.5415	41.8539	67.606	69.4326
3:00:00	21.7654	19.8639	22.6024	43.1564	38.5185	6.61505	17.3801	39.0394	27.6027	29.0569											31.1095	48.4767	31.1568	30.0011	43.4844	40.8904	52.7737	29.0862	66.4271	73.8481
4:00:00	13.2601	16.5667	18.8902	20.6735	18.7562	13.2671	10.7891	14.7891	16.8901	20.1345											30.2467	29.3357	22.7893	31.3456	22.7899	28.6783	38.5673	34.2674	40.2345	50.3456
6:00:00	10.1463	17.3678	15.7846	8.8793	11.7683	11.6724	6.89762	10.9827	13.7823	14.7892	7.8776										20.5671	23.8971	28.7641	27.6782	30.5672	25.7623	23.2357	20.6712	26.4671	25.7892	32.7845
