# Supplementary material for: Partitioning to ordered membrane domains regulates the kinetics of secretory traffic
Source: eLife. 2024 Jun 5;12:RP89306. doi: 10.7554/eLife.89306 (PMC11152573; doi:10.7554/eLife.89306)
Supplement: Figure 4—source data 1. [file elife-89306-fig4-data1.xlsx]

## Sheet: Sheet1
Hours	LAT-TMDwt			allL-TMD			LAT-TMD +raft inhib			allL-TMD + raft inhib
0:00:00	1	1	1	1	1	1	1	1	1	1	1	1
1:00:00	0.464707	0.542864	0.469034	0.82	0.507939	0.70312	0.617954	0.663217	0.634126	0.733273	0.678912	0.703458
2:00:00	0.318864	0.285382	0.279823	0.56	0.400483	0.683214	0.511829	0.490367	0.503451	0.555413	0.543278	0.560893
3:00:00	0.255851	0.160089	0.204561	0.25	0.343746	0.389835	0.333593	0.329871	0.318934	0.475777	0.389812	0.41789
24:00:00	0	0	0				0	0	0
30:00:00				0	0	0				0	0	0
