# Supplementary material for: Partitioning to ordered membrane domains regulates the kinetics of secretory traffic
Source: eLife. 2024 Jun 5;12:RP89306. doi: 10.7554/eLife.89306 (PMC11152573; doi:10.7554/eLife.89306)
Supplement: Figure 4—source data 2. [file elife-89306-fig4-data2.xlsx]

## Sheet: Sheet1
LAT-TMD				allL-TMD				LAT-TMD + MZA				allL-TMD + MZA
1	0.88	1.1		2.1	1.5	1.85		1.65	1.3	1.58		2.2	1.7	2.3
