# Supplementary material for: Partitioning to ordered membrane domains regulates the kinetics of secretory traffic
Source: eLife. 2024 Jun 5;12:RP89306. doi: 10.7554/eLife.89306 (PMC11152573; doi:10.7554/eLife.89306)
Supplement: Figure 5—source data 1. [file elife-89306-fig5-data1.xlsx]

## Sheet: Sheet1
0 min			5 min
0.85	0.94	0.85	0.86	0.87	0.9
0.87	0.82	0.86	0.83	0.82	0.9
0.93	0.88	0.89	0.87	0.85	0.94
0.95	0.92	0.91	0.91	0.83	0.94
0.96	0.9	0.79	0.93	0.8	0.85
0.93	0.91	0.89	0.93	0.91	0.82
0.87	0.89	0.9	0.71	0.83	0.65
0.77	0.93	0.93	0.86	0.87	0.9
0.91	0.95	0.89	0.79	0.86	0.82
0.87	0.88	0.91	0.86	0.88	0.9
0.94	0.87	0.93	0.92	0.69	0.9
0.88	0.9	0.95	0.89	0.83	0.86
0.92	0.89	0.93	0.91	0.92	0.84
0.92	0.93	0.9	0.9	0.91	0.77
0.93	0.9	0.88		0.87	0.91
0.95	0.89	0.95		0.83	0.88
0.91	0.91	0.94		0.84
0.94	0.92			0.85
0.93	0.88			0.94
0.85	0.92
0.904	0.9015	0.9	0.869286	0.852632	0.86125	mean
