# Supplementary material for: Partitioning to ordered membrane domains regulates the kinetics of secretory traffic
Source: eLife. 2024 Jun 5;12:RP89306. doi: 10.7554/eLife.89306 (PMC11152573; doi:10.7554/eLife.89306)
Supplement: Figure 5—source data 2. [file elife-89306-fig5-data2.xlsx]

## Sheet: Sheet1
LAT vs LATallL	LAT vs LAT-TMD	LAT vs GPI	GPI vs TfR	GPI vs GPI
0.711538	0.906364	0.908	0.825	0.914
0.684167	0.895385	0.898	0.834	0.923
0.6689	0.9134	0.895	0.806	0.909
