# Supplementary material for: Partitioning to ordered membrane domains regulates the kinetics of secretory traffic
Source: eLife. 2024 Jun 5;12:RP89306. doi: 10.7554/eLife.89306 (PMC11152573; doi:10.7554/eLife.89306)
Supplement: Figure 5—source data 4. [file elife-89306-fig5-data4.xlsx]

## Sheet: Sheet1
LAT			allL			TGN46			ST
1.32	1.38	1.29	0.77	0.64	0.68	1.13	1.15	1.02	0.33	0.56	0.41
